**Table E1.** List of Instruments.

| CODE* | Telescope (& CCD)                            | Observatory (or Observer)                                     | Site                       |
|-------|----------------------------------------------|---------------------------------------------------------------|----------------------------|
| COO   | PF 74 cm reflector+SBIG STL1001E             | Lewis Cook                                                    | California, USA            |
| CRI   | 38cm K-380+Apogee E47                        | Crimean astrophysical observatory                             | Crimea                     |
| GFB   | CDK 50cm+Apogee U6                           | William Goff                                                  | California, USA            |
| IMi   | 35cmSC+SXVR-H16                              | Ian Miller                                                    | Furzehill Observatory, UK  |
| Ioh   | 30cmSC+ST-9XE CCD                            | Hiroshi Itoh                                                  | Tokyo, Japan               |
| Kis   | 25cm SC+Alta F47                             | Seiichiro Kiyota                                              | Kamagaya, Japan            |
| Mhh   |                                              | Hiroyuki Maehara                                              | Japan                      |
| Mic   | 84cm+E2V 42-40                               | San Pedro Martir Observatory                                  | Baja California, Mexico    |
| MLF   | 30cmRCX400+ST8-XME                           | Berto Monard Calitzdorp                                       | South Africa               |
|       | 35cmRCX400+ST8-XME                           | Berto Monard Calitzdorp                                       | South Africa               |
| OKU   | 51cm+Andor DW936N-BV                         | OKU Astronomical Observatory                                  | Osaka, Japan               |
| RPc   | FTN 2.0m+E2V 42-40                           | LCOGT <sup>‡</sup>                                            | Hawaii, USA                |
|       | 35cmSC+SXV-H9 CCD                            | Roger D. Pickard                                              | UK                         |
| RIT   | 30cm+ST-9E                                   | RIT Observatory                                               | New York, USA              |
| SGE   | 43cmCDK+STXL-11002                           | Sierra Remote Observatories                                   | Auberry, CA, USA           |
| SHU   | 18/225cm Maksutov telescope+SBIG ST-10XME    | Stara Lesna                                                   | Slovakia                   |
|       | 60/750cm Zeiss telescope+FLI ML 3041         | Stara Lesna                                                   | Slovakia                   |
|       | 50/200cm Maksutov telescope+Apogee Alta U16M | Crimean Stations of Sternberg<br>Astronomical Institute (SAI) | Crimea                     |
|       | 250/2000cm+LNI BSI NBI 4k*4k                 | Caucasian Mountain Observatory<br>KGO (SAI, KGO)              | The North Caucasus, Russia |
| SRI   | CDK 43cm+SBIG STL-1001                       | Richard Sabo                                                  | Montana, USA               |
| Trt   | 25cm ALCCD5.2 (QHY6)                         | Tamás Tordai                                                  | Budapest, Hungary          |

\*Observer's code: COO (Lewis M. Cook), CRI (Crimean Observatory), GFB (William Goff), IMi (Ian Miller), Ioh (Hiroshi Itoh), Kis (Seiichiro Kiyota), Mhh (Hiroyuki Maehara), Mic (Raúl Michel), MLF (Berto Monard), Njh (Kazuhiro Nakajima), OKU (Osaka Kyoiku Univ. team), RPc (Roger D. Pickard), RIT (Michael Richmond), SGE (Geoff Stone), SHU (Sergey Yu. Shugarov, Natalia Katysheva, Polina Golysheva, Olga Vozyakova), SRI (Richard Sabo), Trt (Tamás Tordai).

<sup>†</sup>itelescope.net.

<sup>‡</sup>Las Cumbres Observatory Global Telescope Network.

**Table E2.** Log of observations of the 2016 outburst of 1SWASP J1621.

| Start*   | End*     | Mag <sup>†</sup> | Error <sup>‡</sup> | N <sup>§</sup> | Obs <sup>  </sup> | Band <sup>#</sup> |
|----------|----------|------------------|--------------------|----------------|-------------------|-------------------|
| 466.9381 | 467.0381 | 3.093            | 0.015              | 47             | Mic               | R <sub>C</sub>    |
| 466.9387 | 467.0365 | 3.161            | 0.017              | 46             | Mic               | V                 |
| 466.9395 | 467.0373 | 3.089            | 0.026              | 46             | Mic               | B                 |
| 468.9367 | 468.9931 | 3.233            | 0.027              | 26             | Mic               | R <sub>C</sub>    |
| 468.9373 | 468.9937 | 3.292            | 0.029              | 26             | Mic               | V                 |
| 468.9382 | 468.9922 | 3.183            | 0.029              | 25             | Mic               | B                 |
| 505.7052 | 506.0115 | 3.103            | 0.016              | 137            | Mic               | B                 |
| 505.7060 | 506.0101 | 3.138            | 0.013              | 136            | Mic               | R <sub>C</sub>    |
| 505.7066 | 506.0107 | 3.199            | 0.014              | 136            | Mic               | V                 |
| 542.8993 | 542.9831 | 1.441            | 0.006              | 38             | Mic               | R <sub>C</sub>    |
| 542.8999 | 542.9837 | 1.202            | 0.007              | 38             | Mic               | V                 |
| 542.9007 | 542.9846 | 0.653            | 0.009              | 38             | Mic               | B                 |
| 543.6787 | 543.9624 | 13.501           | 0.014              | 812            | SGE               | CV                |
| 543.8746 | 543.9054 | 14.243           | 0.048              | 34             | HBB               | V                 |
| 544.6798 | 544.9507 | 13.804           | 0.020              | 400            | SGE               | CV                |
| 544.7206 | 544.8464 | 13.786           | 0.016              | 313            | COO               | CV                |
| 544.8811 | 544.9792 | 1.907            | 0.052              | 44             | Mic               | R <sub>C</sub>    |
| 544.8817 | 544.9776 | 1.745            | 0.062              | 43             | Mic               | V                 |
| 544.8826 | 544.9784 | 1.284            | 0.079              | 43             | Mic               | B                 |
| 545.3104 | 545.5287 | 1.759            | 0.013              | 485            | CRI               | CV                |
| 545.4019 | 545.5645 | 13.891           | 0.026              | 219            | RPc               | V                 |
| 545.4019 | 545.5645 | 13.891           | 0.027              | 219            | PXR               | V                 |
| 545.4241 | 545.5385 | 1.695            | 0.007              | 66             | SHU               | CV                |
| 545.6793 | 545.9420 | 13.885           | 0.016              | 300            | SRI               | CV                |
| 545.7179 | 545.9854 | 14.102           | 0.022              | 362            | SGE               | CV                |
| 545.7365 | 545.9182 | 13.489           | 0.010              | 877            | COO               | R                 |
| 546.3322 | 546.4039 | 14.259           | 0.041              | 101            | Trt               | V                 |
| 546.3322 | 546.4039 | 14.259           | 0.041              | 101            | TRT               | V                 |
| 546.4068 | 546.6473 | 2.009            | 0.023              | 150            | Mic               | R <sub>C</sub>    |
| 546.4071 | 546.6477 | 1.876            | 0.027              | 150            | Mic               | V                 |
| 546.4078 | 546.6483 | 1.459            | 0.038              | 150            | Mic               | B                 |
| 546.4359 | 546.5066 | 1.898            | 0.009              | 47             | SHU               | R <sub>C</sub>    |
| 546.4375 | 546.4540 | 1.829            | 0.008              | 2              | SHU               | CV                |
| 546.4691 | 546.4796 | 14.396           | 0.013              | 14             | JSJ               | B                 |
| 546.6157 | 546.7485 | 13.847           | 0.004              | 242            | LCO               | CV                |
| 546.6840 | 546.9420 | 14.179           | 0.017              | 270            | SRI               | CV                |
| 547.2813 | 547.4122 | 2.134            | 0.025              | 31             | CRI               | R <sub>C</sub>    |
| 547.2853 | 547.4100 | 1.592            | 0.019              | 31             | CRI               | B                 |
| 547.2940 | 547.4115 | 1.980            | 0.023              | 30             | CRI               | V                 |
| 547.2953 | 547.4128 | 2.229            | 0.025              | 30             | CRI               | I <sub>C</sub>    |
| 547.3109 | 547.5321 | 2.162            | 0.013              | 500            | CRI               | CV                |
| 547.3536 | 547.4979 | 2.275            | 0.028              | 134            | SHU               | R <sub>C</sub>    |
| 547.3596 | 547.4988 | 2.040            | 0.019              | 6              | SHU               | CV                |
| 547.4130 | 547.6069 | 14.341           | 0.017              | 351            | IMi               | V                 |
| 547.4426 | 547.5714 | 14.179           | 0.005              | 181            | Trt               | V                 |
| 547.4426 | 547.5714 | 14.179           | 0.005              | 181            | TRT               | V                 |
| 547.5081 | 547.6157 | 14.139           | 0.007              | 125            | BSM               | CV                |
| 547.6819 | 547.9724 | 14.355           | 0.012              | 648            | SGE               | CV                |
| 548.2983 | 548.5226 | 2.155            | 0.056              | 52             | CRI               | B                 |
| 548.2998 | 548.5200 | 2.439            | 0.040              | 52             | CRI               | V                 |

**Table E2.** Log of observations of the 2016 outburst of 1SWASP J1621 (continued).

| Start*   | End*     | Mag <sup>†</sup> | Error <sup>‡</sup> | $N^{\S}$ | Obs <sup>  </sup> | Band <sup>#</sup> |
|----------|----------|------------------|--------------------|----------|-------------------|-------------------|
| 548.3005 | 548.5207 | 2.526            | 0.032              | 52       | CRI               | $R_C$             |
| 548.3011 | 548.5213 | 2.557            | 0.025              | 52       | CRI               | $I_C$             |
| 548.3439 | 548.4874 | 2.620            | 0.027              | 93       | NKa               | $R_C$             |
| 548.3439 | 548.4874 | 2.622            | 0.027              | 93       | SHU               | $R_C$             |
| 548.3584 | 548.5426 | 2.473            | 0.012              | 416      | CRI               | $CV$              |
| 548.3680 | 548.4865 | 2.521            | 0.043              | 4        | SHU               | $CV$              |
| 548.3890 | 548.6118 | 14.598           | 0.014              | 266      | BPO               | $CV$              |
| 548.4251 | 548.5936 | 14.716           | 0.016              | 314      | IMi               | $V$               |
| 548.5078 | 548.6157 | 14.456           | 0.010              | 119      | BSM               | $CV$              |
| 548.6831 | 548.9865 | 14.714           | 0.012              | 541      | SGE               | $CV$              |
| 549.3060 | 549.4802 | 2.406            | 0.016              | 44       | CRI               | $B$               |
| 549.3074 | 549.4776 | 2.668            | 0.016              | 43       | CRI               | $V$               |
| 549.3082 | 549.4783 | 2.728            | 0.017              | 43       | CRI               | $R_C$             |
| 549.3087 | 549.4789 | 2.699            | 0.017              | 43       | CRI               | $I_C$             |
| 549.6008 | 549.8552 | 15.795           | 0.031              | 95       | CMJ               | $B$               |
| 549.6020 | 549.8564 | 15.010           | 0.020              | 96       | CMJ               | $V$               |
| 549.6277 | 549.8538 | 14.966           | 0.014              | 176      | RIT               | $CV$              |
| 549.6900 | 549.9682 | 14.985           | 0.010              | 548      | SGE               | $CV$              |
| 549.6976 | 549.9180 | 15.741           | 0.038              | 89       | GFB               | $B$               |
| 549.6985 | 549.9190 | 14.985           | 0.023              | 90       | GFB               | $V$               |
| 550.0408 | 550.1700 | 0.765            | 0.010              | 338      | OKU               | $CV$              |
| 550.0501 | 550.2506 | 14.832           | 0.012              | 308      | Kis               | $CV$              |
| 550.0555 | 550.2780 | 14.625           | 0.010              | 284      | Ioh               | $R_C$             |
| 550.2851 | 550.5242 | 2.734            | 0.030              | 60       | CRI               | $B$               |
| 550.2866 | 550.5216 | 2.921            | 0.023              | 59       | CRI               | $V$               |
| 550.2873 | 550.5223 | 2.936            | 0.021              | 59       | CRI               | $R_C$             |
| 550.2879 | 550.5229 | 2.860            | 0.018              | 59       | CRI               | $I_C$             |
| 550.3179 | 550.6242 | 14.940           | 0.012              | 183      | BSM               | $CV$              |
| 550.3451 | 550.5412 | 3.126            | 0.082              | 6        | SHU               | $CV$              |
| 550.6839 | 550.9838 | 15.127           | 0.009              | 541      | SGE               | $CV$              |
| 550.6942 | 550.9266 | 15.103           | 0.015              | 136      | SRI               | $CV$              |
| 550.6974 | 550.9731 | 15.972           | 0.020              | 230      | GFB               | $B$               |
| 551.2732 | 551.5204 | 2.999            | 0.028              | 62       | CRI               | $B$               |
| 551.2747 | 551.5218 | 3.096            | 0.025              | 62       | CRI               | $V$               |
| 551.2754 | 551.5226 | 3.061            | 0.022              | 62       | CRI               | $R_C$             |
| 551.2760 | 551.5232 | 2.963            | 0.019              | 62       | CRI               | $I_C$             |
| 552.4002 | 552.4594 | 3.129            | 0.021              | 32       | NKa               | $CV$              |
| 552.4002 | 552.4594 | 3.197            | 0.021              | 32       | SHU               | $CV$              |
| 552.6653 | 552.8563 | 16.368           | 0.024              | 72       | CMJ               | $B$               |

**Table E2.** Log of observations of the 2016 outburst of 1SWASP J1621 (continued).

| Start*   | End*     | Mag <sup>†</sup> | Error <sup>‡</sup> | $N^{\S}$ | Obs <sup>  </sup> | Band <sup>#</sup> |
|----------|----------|------------------|--------------------|----------|-------------------|-------------------|
| 552.6666 | 552.8550 | 15.385           | 0.023              | 70       | CMJ               | V                 |
| 553.5893 | 553.8566 | 16.317           | 0.024              | 103      | CMJ               | B                 |
| 553.5905 | 553.8553 | 15.325           | 0.017              | 102      | CMJ               | V                 |
| 553.6977 | 553.9739 | 16.306           | 0.014              | 230      | GFB               | B                 |
| 553.7135 | 553.8156 | 15.181           | 0.012              | 26       | SGE               | V                 |
| 554.0120 | 554.1428 | 1.030            | 0.007              | 289      | OKU               | CV                |
| 554.3890 | 554.5240 | 15.312           | 0.018              | 71       | PVE               | V                 |
| 554.4558 | 554.5183 | 3.126            | 0.012              | 67       | NKa               | CV                |
| 554.4558 | 554.5183 | 3.202            | 0.012              | 67       | SHU               | CV                |
| 554.6905 | 554.9057 | 15.333           | 0.024              | 72       | SGE               | V                 |
| 554.6935 | 554.9087 | 16.363           | 0.036              | 72       | SGE               | B                 |
| 555.3449 | 555.5094 | 14.169           | 0.066              | 9        | PVE               | I <sub>C</sub>    |
| 555.3524 | 555.5439 | 15.359           | 0.025              | 55       | PVE               | V                 |
| 555.3917 | 555.5158 | 16.326           | 0.085              | 8        | PVE               | B                 |
| 555.6884 | 555.9814 | 15.211           | 0.023              | 49       | SGE               | V                 |
| 555.6913 | 555.9845 | 16.242           | 0.028              | 53       | SGE               | B                 |
| 556.3195 | 556.5463 | 14.141           | 0.019              | 61       | PVE               | I <sub>C</sub>    |
| 556.3574 | 556.5290 | 16.347           | 0.085              | 8        | PVE               | B                 |
| 556.3631 | 556.5347 | 15.311           | 0.050              | 8        | PVE               | V                 |
| 556.6001 | 556.8552 | 16.352           | 0.021              | 99       | CMJ               | B                 |
| 556.6014 | 556.8539 | 15.352           | 0.018              | 97       | CMJ               | V                 |
| 556.6899 | 556.9798 | 15.297           | 0.020              | 94       | SGE               | V                 |
| 556.6930 | 556.9829 | 16.310           | 0.026              | 94       | SGE               | B                 |
| 557.3278 | 557.4053 | 14.093           | 0.034              | 14       | PVE               | I <sub>C</sub>    |
| 557.3304 | 557.4133 | 15.278           | 0.045              | 15       | PVE               | V                 |
| 558.3199 | 558.5466 | 15.373           | 0.019              | 99       | PVE               | V                 |
| 563.0314 | 563.0755 | 0.916            | 0.010              | 62       | OKU               | R <sub>C</sub>    |
| 566.0187 | 566.1714 | 1.052            | 0.013              | 160      | OKU               | R <sub>C</sub>    |
| 617.3656 | 617.5738 | 15.229           | 0.009              | 288      | RPc               | CV                |
| 630.3350 | 630.5050 | 15.238           | 0.009              | 236      | RPc               | CV                |
| 665.2928 | 665.3731 | 15.202           | 0.012              | 106      | RPc               | CV                |
| 823.4359 | 823.5977 | 14.696           | 0.143              | 30       | WTH               | R <sub>C</sub>    |

\*BJD–2457000.0.

†Mean magnitude.

‡ $1\sigma$  of mean magnitude.

§Number of observations.

|| Observer's code: GFB (William Goff), Kis (Seiichiro Kiyota), COO (Lewis M. Cook), Ioh (Hiroshi Itoh), CRI (Cremean Observatory), OKU (Osaka Kyoiku Univ. team), Trt (Tamás Tordai), RPc (Roger D. Pickard), IMi (Ian Miller), RIT (Michael Richmond), SGE (Geoff Stone), SHU (S. Shugarov team), SRI (Richard Sabo), LCO (Colin Littlefield), NKa (Natalia Katysheva & Sergei Yu. Shugarov), PVE (Velimir Popov), HBB (Barbara Harris), CMJ (Michael Cook), WTH (Wikander, Thomas).

#Filter. "CV" means no (clear) filter.

**Table E3.** Log of observations of the 2006 outburst and the 2013 quiescence of BD Pav.

| Start*    | End*      | Mag <sup>†</sup> | Error <sup>‡</sup> | $N^{\S}$ | Obs <sup>  </sup> | Band <sup>#</sup> |
|-----------|-----------|------------------|--------------------|----------|-------------------|-------------------|
| 979.2944  | 79.4928   | 12.481           | 0.003              | 539      | MLF               | <i>CV</i>         |
| 980.1966  | 80.5440   | 12.540           | 0.002              | 903      | MLF               | <i>CV</i>         |
| 982.1992  | 82.5138   | 12.635           | 0.003              | 851      | MLF               | <i>CV</i>         |
| 983.2130  | 83.5227   | 12.699           | 0.003              | 880      | MLF               | <i>CV</i>         |
| 984.1914  | 84.5195   | 12.776           | 0.003              | 930      | MLF               | <i>CV</i>         |
| 985.1892  | 85.5080   | 12.965           | 0.003              | 858      | MLF               | <i>CV</i>         |
| 3454.7143 | 2554.8467 | 15.152           | 0.114              | 150      | OAR               | <i>V</i>          |
| 3455.6887 | 2555.9171 | 15.157           | 0.144              | 220      | OAR               | <i>V</i>          |
| 3457.7425 | 2557.9143 | 15.101           | 0.109              | 167      | OAR               | <i>V</i>          |
| 3460.7053 | 2560.8474 | 15.039           | 0.030              | 9        | OAR               | <i>V</i>          |
| 3461.7647 | 2561.7685 | 14.956           | 0.015              | 5        | OAR               | <i>V</i>          |
| 3462.7649 | 2562.7688 | 15.077           | 0.033              | 5        | OAR               | <i>V</i>          |
| 3463.7621 | 2563.7657 | 15.156           | 0.016              | 5        | OAR               | <i>V</i>          |

\*BJD–2453000.0.

<sup>†</sup>Mean magnitude.<sup>‡</sup> $1\sigma$  of mean magnitude.<sup>§</sup>Number of observations.<sup>||</sup>Observer's code: MLF (Berto Monard).<sup>#</sup>Filter. "*CV*" means no (clear) filter.

**Table E4.** Log of observations of the 2009 outburst of V364 Lib.

| Start*   | End*    | Mag <sup>†</sup> | Error <sup>‡</sup> | $N^{\S}$ | Obs <sup>  </sup> | Band <sup>#</sup> |
|----------|---------|------------------|--------------------|----------|-------------------|-------------------|
| 928.0757 | 28.2011 | 10.412           | 0.001              | 405      | Mhh               | V                 |
| 928.1202 | 28.2177 | 11.478           | 0.003              | 223      | Njh               | CV                |
| 928.2010 | 28.2883 | 1.822            | 0.001              | 481      | OUS               | CV                |
| 928.2017 | 28.2036 | 10.569           | 0.006              | 6        | Mhh               | B                 |
| 929.1080 | 29.1733 | 10.711           | 0.001              | 89       | Kis               | CV                |
| 929.1197 | 29.2284 | 1.893            | 0.002              | 351      | OUS               | CV                |
| 930.0970 | 30.2722 | 11.460           | 0.001              | 412      | Njh               | CV                |
| 930.1155 | 30.2758 | 1.880            | 0.001              | 885      | OUS               | CV                |
| 930.1287 | 30.1968 | 10.732           | 0.002              | 96       | Kis               | CV                |
| 930.1431 | 30.2359 | 10.436           | 0.002              | 138      | Mhh               | V                 |
| 930.1434 | 30.2355 | 10.628           | 0.002              | 136      | Mhh               | B                 |
| 931.0911 | 31.3198 | 11.493           | 0.001              | 537      | Njh               | CV                |
| 931.0944 | 31.1718 | 10.710           | 0.003              | 104      | Kis               | CV                |
| 932.0938 | 32.2945 | 11.552           | 0.001              | 465      | Njh               | CV                |
| 932.1091 | 32.1847 | 10.770           | 0.003              | 102      | Kis               | CV                |
| 932.1812 | 32.2890 | 10.729           | 0.001              | 410      | Mhh               | B                 |
| 937.1064 | 37.1435 | 11.750           | 0.002              | 88       | Njh               | CV                |
| 938.0842 | 38.2074 | 11.906           | 0.003              | 237      | Njh               | CV                |
| 939.2176 | 39.3233 | 11.199           | 0.001              | 591      | Mhh               | CV                |
| 945.1195 | 45.2613 | 12.179           | 0.001              | 335      | Njh               | CV                |
| 947.1338 | 47.1456 | 12.247           | 0.005              | 29       | Njh               | CV                |
| 949.0912 | 49.2735 | 12.347           | 0.002              | 422      | Njh               | CV                |
| 950.1414 | 50.2637 | 12.363           | 0.002              | 288      | Njh               | CV                |
| 951.0445 | 51.2736 | 12.407           | 0.002              | 540      | Njh               | CV                |
| 951.3060 | 51.6199 | 0.042            | 0.001              | 1623     | MLF               | V                 |
| 952.0562 | 52.1361 | 12.431           | 0.002              | 189      | Njh               | CV                |
| 953.0907 | 53.2577 | 12.433           | 0.001              | 392      | Njh               | CV                |
| 965.0846 | 65.2432 | 12.440           | 0.001              | 370      | Njh               | CV                |

\*BJD–2454000.0.

†Mean magnitude.

‡ $1\sigma$  of mean magnitude.

§Number of observations.

||Observer's code: Mhh (Hiroyuki Maehara), Njh (Kazuhiro Nakajima), OUS (Okayama U. of Science), Kis (Seiichiro Kiyota).

#Filter. "CV" means no (clear) filter.

**Table E5.** Log of spectroscopic observations of V364 Lib.

| Date*      | Name <sup>†</sup> | Start Time <sup>‡</sup> | End Time <sup>§</sup> | Exp <sup>  </sup> | Number <sup>#</sup> | Grating <sup>¶</sup> | Site <sup>**</sup> |
|------------|-------------------|-------------------------|-----------------------|-------------------|---------------------|----------------------|--------------------|
| 2009-04-07 | V364 Lib          | 54929.1854              | 54929.2062            | 60                | 11                  | Grism                | G                  |
| 2009-04-09 | V364 Lib          | 54931.1862              | 54931.2022            | 60                | 15                  | Grism                | G                  |
| 2009-04-10 | V364 Lib          | 54932.1536              | 54932.1703            | 60                | 12                  | Grism                | G                  |
| –          | V364 Lib          | 54932.1953              | 54932.2043            | 60                | 9                   | Grism                | G                  |
| 2009-04-15 | V364 Lib          | 54937.0754              | 54937.0764            | 30                | 3                   | $I_C$                | G                  |
| –          | V364 Lib          | 54937.0816              | 54937.0948            | 60                | 11                  | Grism                | G                  |
| 2009-04-18 | V364 Lib          | 54940.1137              | 54940.1151            | 60                | 2                   | Grism                | G                  |
| 2009-04-19 | V364 Lib          | 54941.0797              | 54941.0901            | 60                | 10                  | Grism                | G                  |
| 2009-04-22 | V364 Lib          | 54944.0798              | 54944.0902            | 60                | 10                  | Grism                | G                  |
| 2009-04-23 | V364 Lib          | 54945.1173              | 5494.1257             | 60                | 5                   | Grism                | G                  |
| 2009-04-26 | V364 Lib          | 54948.1084              | 54948.1209            | 120               | 5                   | Grism                | G                  |
| 2009-04-27 | V364 Lib          | 54949.0751              | 54949.0820            | 60                | 6                   | Grism                | G                  |
| 2009-04-28 | V364 Lib          | 54950.1300              | 54950.1473            | 60                | 12                  | Grism                | G                  |
| 2009-05-02 | V364 Lib          | 54954.0627              | 54954.0738            | 60                | 10                  | Grism                | G                  |
| 2009-05-05 | V364 Lib          | 54961.8932              | 54961.9392            | 900               | 5                   | std-Yd               | S                  |
| –          | V364 Lib          | 54961.9619              | 54961.0183            | 900               | 6                   | std-Bc               | S                  |
| –          | V364 Lib          | 54962.0348              | 54962.0573            | 900               | 3                   | std-Yd               | S                  |
| 2009-05-08 | V364 Lib          | 54960.1634              | 54960.0759            | 60                | 10                  | Grism                | G                  |
| 2009-05-13 | V364 Lib          | 54965.1412              | 54965.0419            | 20                | 3                   | R                    | G                  |
| –          | V364 Lib          | 54965.1510              | 54965.1579            | 60                | 7                   | Grism                | G                  |
| 2009-05-20 | V364 Lib          | 54972.1113              | 54972.1183            | 60                | 6                   | Grism                | G                  |

\*Observational date (Japan Standard Time).

<sup>†</sup>Name of star.<sup>‡</sup>Start time of observations in the unit of BJD–2400000.<sup>§</sup>End time of observations in the unit of BJD–2400000.<sup>||</sup>Exposure time of each observation in unit of seconds.<sup>#</sup>Number of observations.<sup>¶</sup>Diffraction or echelle gratings.<sup>\*\*</sup>Name of observatory: S (Subaru Observatory), G (Gunma Observatory).**Table E6.** Radial velocity measured in the 2009 quiescence of V364 Lib.

| Time*      | Phase <sup>†</sup> | Radial Velocity | Error |
|------------|--------------------|-----------------|-------|
| 54929.1934 | 0.7912             | –107.8          | 10.8  |
| 54931.1895 | 0.6329             | –50.3           | 11.3  |
| 54932.1952 | 0.0648             | 73.3            | 13.7  |
| 54937.0838 | 0.0243             | 42.0            | 22.2  |
| 54941.0801 | 0.7135             | –99.8           | 37.9  |
| 54944.1177 | 0.0379             | –5.6            | 46.4  |
| 54945.1577 | 0.5186             | –12.3           | 52.5  |

\*Time of observations in the unit of BJD–2400000.

<sup>†</sup>Orbital phase under the assumption that the orbital period is 0.7024293 d.

**Table E7.** Radial velocity measured in the 2009 outburst of V364 Lib.

| Time*      | Phase <sup>†</sup> | Radial Velocity | Error |
|------------|--------------------|-----------------|-------|
| 54961.3873 | 0.3746             | −49.7           | 4.3   |
| 54961.3994 | 0.3917             | −38.1           | 3.3   |
| 54961.4107 | 0.4078             | −34.3           | 3.7   |
| 54961.4220 | 0.4239             | −28.4           | 3.7   |
| 54961.4334 | 0.4401             | −21.1           | 4.1   |
| 54961.4561 | 0.4724             | −6.0            | 5.3   |
| 54961.4676 | 0.4888             | 2.4             | 4.3   |
| 54961.4788 | 0.5048             | 8.5             | 4.2   |
| 54961.4901 | 0.5208             | 13.4            | 3.1   |
| 54961.5013 | 0.5367             | 22.5            | 3.1   |
| 54961.5125 | 0.5527             | 30.8            | 2.2   |
| 54961.5289 | 0.5762             | 40.5            | 6.7   |
| 54961.5403 | 0.5923             | 49.5            | 5.5   |
| 54961.5515 | 0.6083             | 51.4            | 4.5   |

\*Time of observations in the unit of BJD−2400000.

<sup>†</sup>Orbital phase under the assumption that the orbital period is 0.7024293 d.



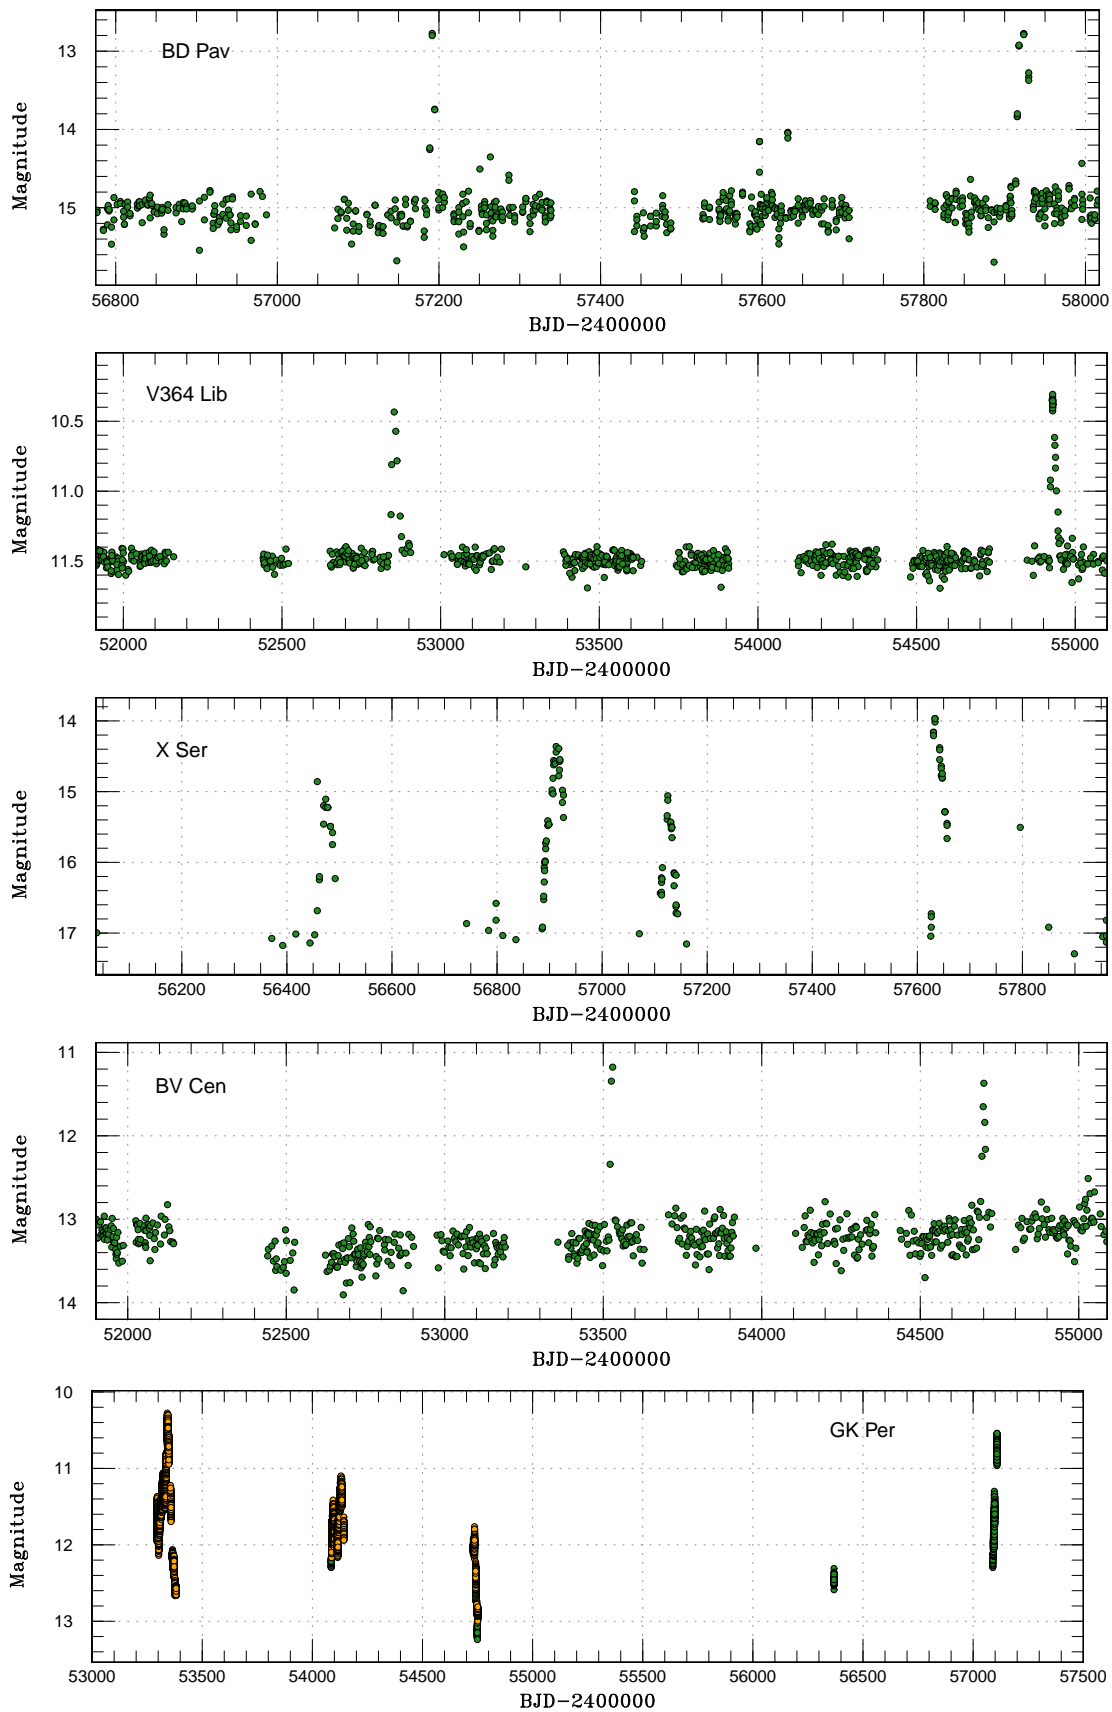

**Fig. E1.** Long-term light curves in the long-period objects discussed in this paper. The light curves of V364 Lib and BV Cen are derived from the ASAS-3 data archive. The light curves of BD Pav and X Ser are derived from the ASAS-SN data archive. Green and orange points represent the observations in the V band and no (clear) filter, respectively.
